# Supplementary material for: Transfer hydrogenation of biomass-derived levulinic acid to γ-valerolactone over supported Ni catalysts
Source: Royal Society of Chemistry journal article supplement (doi:10.1039/c6ra08637c), 2016-01-01
Supplement: c6ra08637c1.pdf [file c6ra08637c1.pdf]

**Transfer hydrogenation of biomass-derived levulinic acid to  
 $\gamma$ -valerolactone over supported Ni catalysts**

**Amol M. Hengne<sup>a</sup>, Brijesh S. Kadu<sup>b</sup>, Narayan S. Biradar<sup>a</sup>, Rajeev C. Chikate<sup>b\*\*</sup> and  
Chandrashekhar V. Rode<sup>a\*</sup>**

<sup>a</sup>Chemical Engineering and Process Development Division,  
CSIR-National Chemical Laboratory, Pune 411008, India

<sup>b</sup>Nanoscience Group, Department of Chemistry, Post-graduate & Research Centre, MES  
Abasaheb Garware College, Pune 411004, India

\*corresponding author email: [cv.rode@ncl.res.in](mailto:cv.rode@ncl.res.in)

Fax: +91 20 2590 2621

Telephone: +91 20 2590 2349

\*\*co-corresponding author email: [rajuchikate29@gmail.com](mailto:rajuchikate29@gmail.com)

**Number of pages: 14**

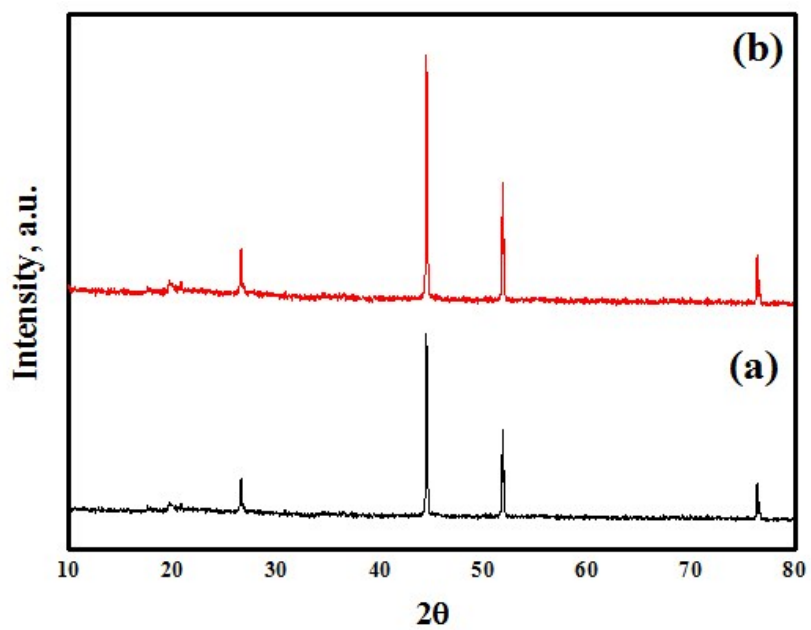

Figure S1. XRD of 50%-Ni/MMT synthesized by calcination and hydrogenation of  $\text{Ni}^{2+}$  adsorbed on MMT. (a) fresh and (b) used

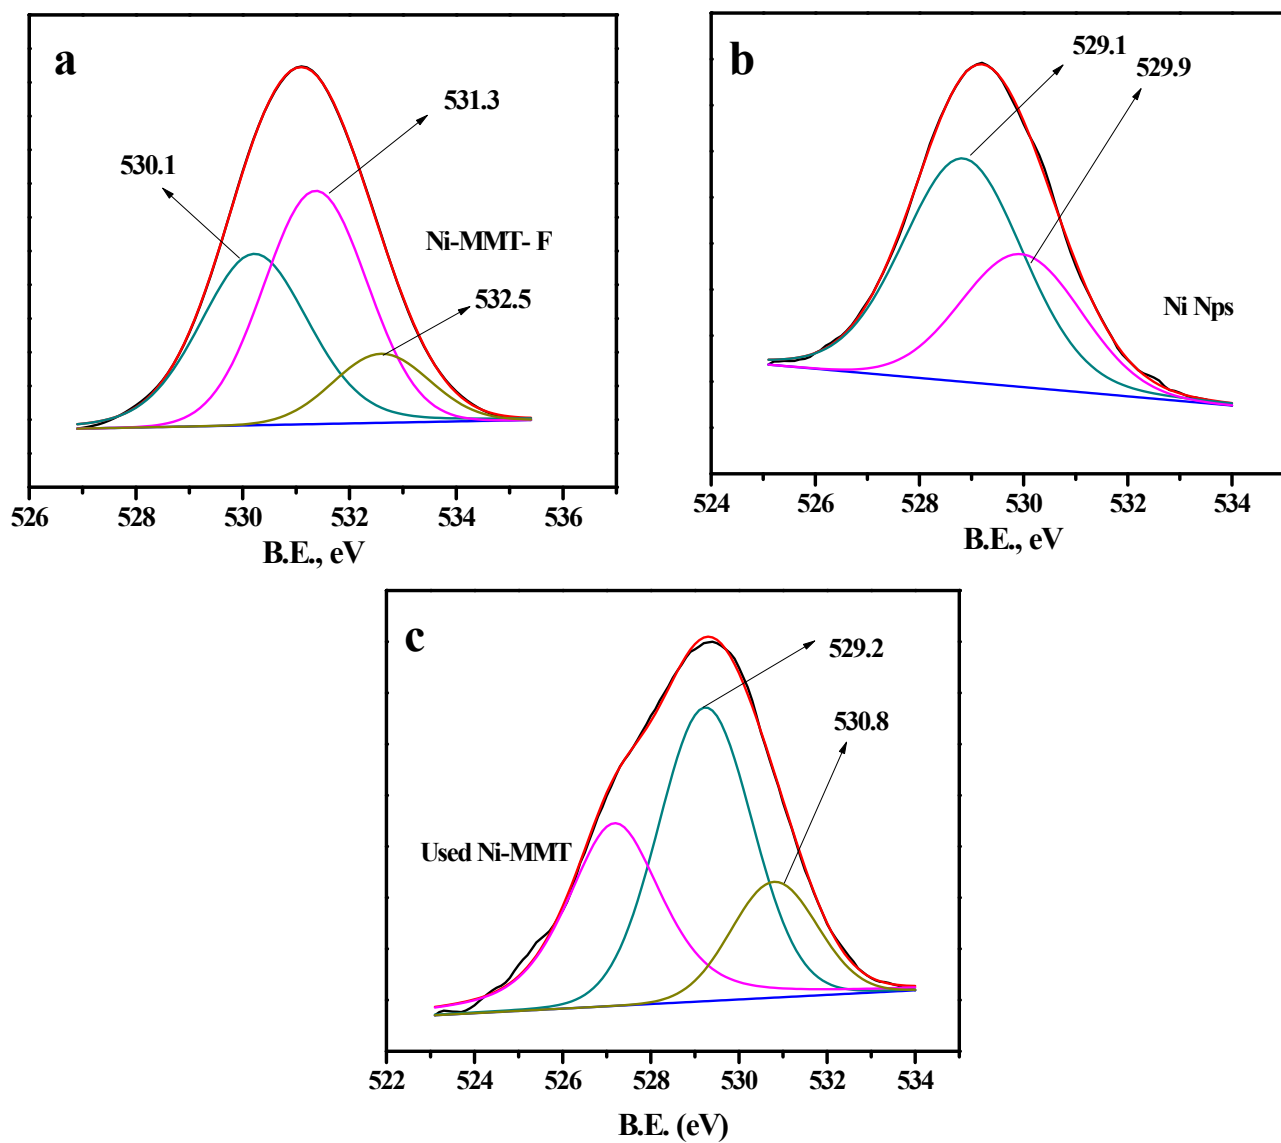

Figure S2. XPS study of oxygen (a) fresh 50%-Ni/MMT (b) Ni NP's and (c) used 50%-Ni/MMT

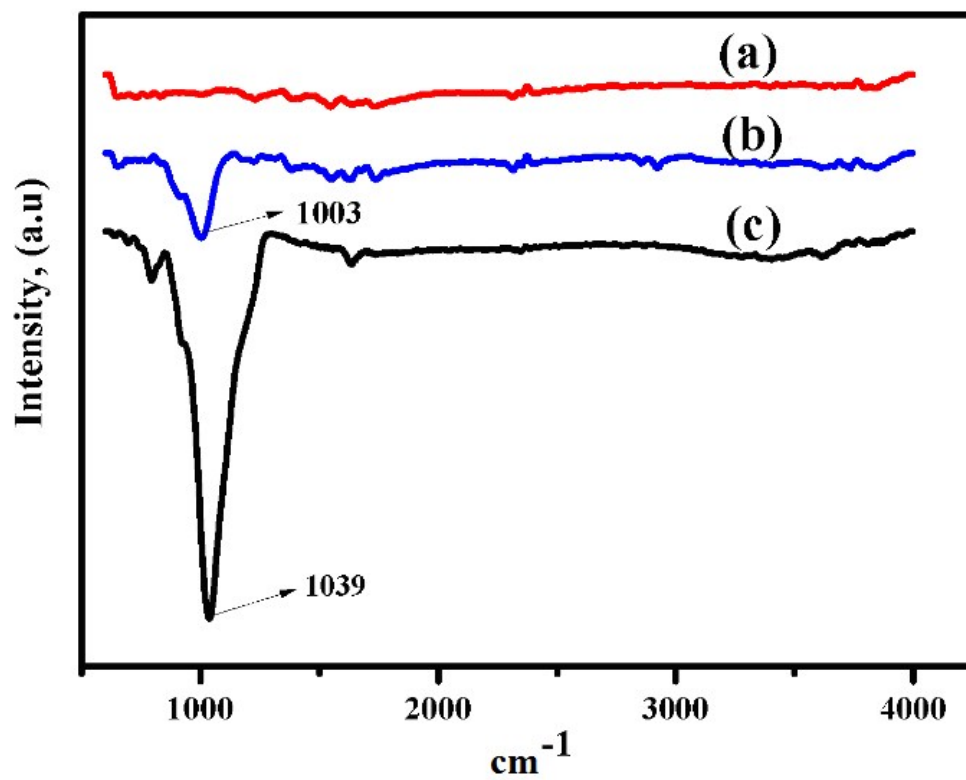

Figure S3. FTIR study of Ni catalysts (a) Ni NP's, (b) 50%-Ni/MMT and (c) Na-MMT

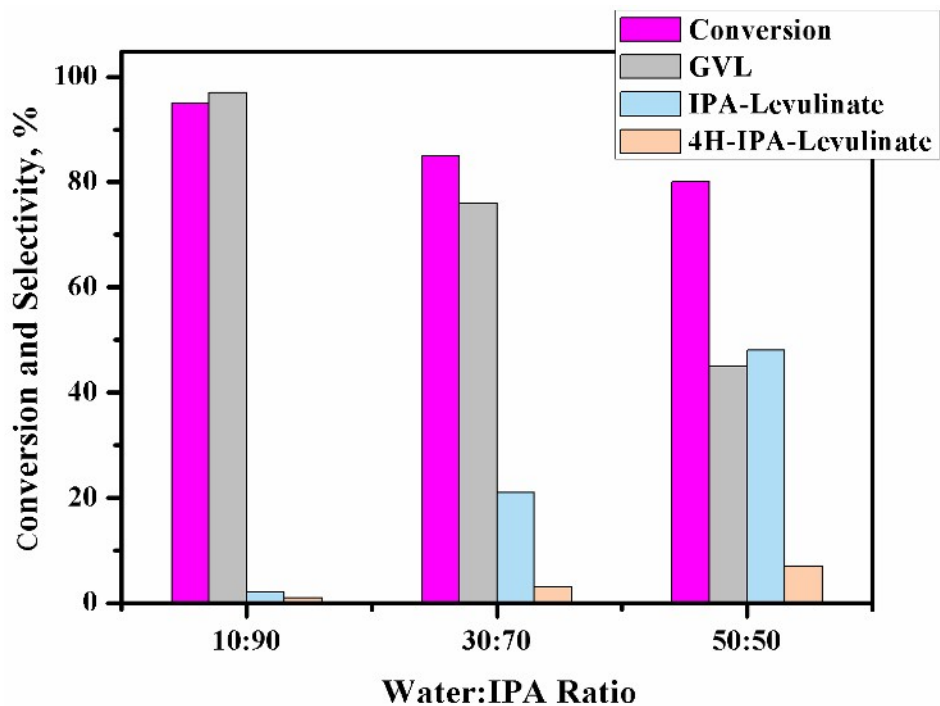

Figure S4. Effect of water and IPA ratio on CTH of LA.

Reaction conditions: LA (5 mL); IPA: Water (95 mL); Metal Loading, 50%; temperature, 200 °C; N<sub>2</sub> atm; catalyst, 0.5 g; reaction time, 1h.

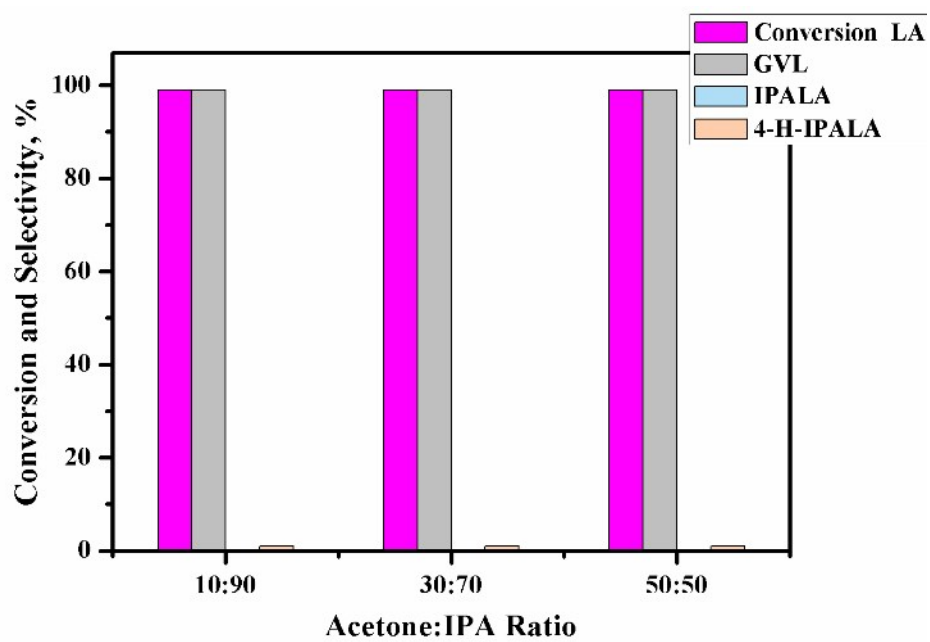

Figure S5. Effect of acetone and IPA ratio on CTH of LA.

Reaction conditions: LA (5 mL); IPA:Acetone (95 mL); Metal loading, 50%; temperature, 200 °C; N<sub>2</sub> atm; catalyst, 0.5 g; reaction time, 1h.

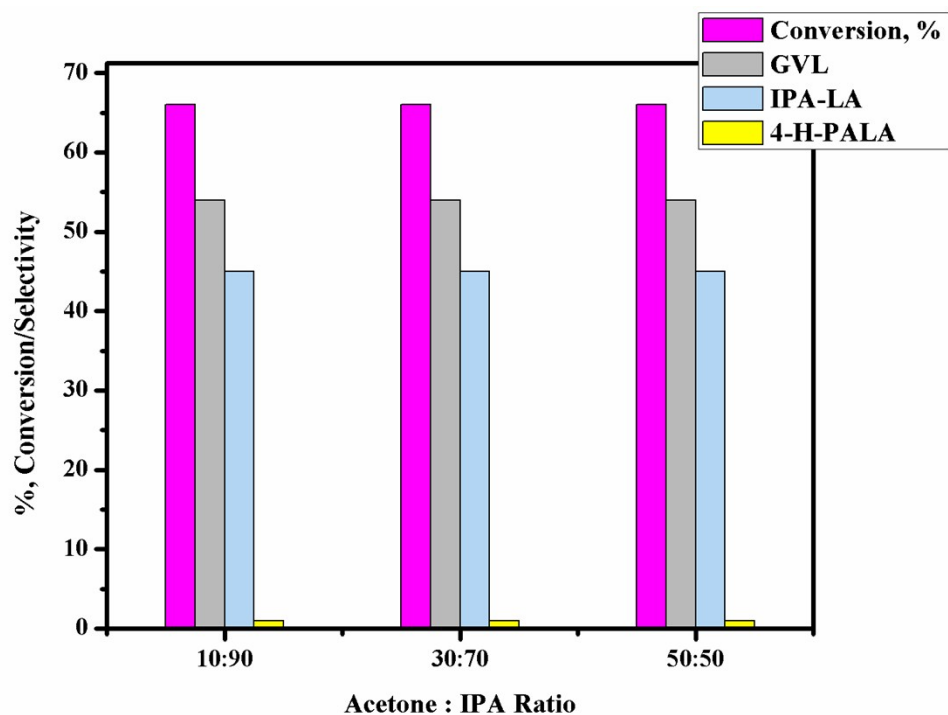

Figure S6. Effect of acetone and IPA ratio on CTH of LA at lower LA conversion. Reaction conditions: LA (5 mL); IPA:Acetone (95 mL); Metal loading, 50%; temperature, 200 °C; N<sub>2</sub> atm; catalyst, 0.5 g; reaction time, 0.5 h.

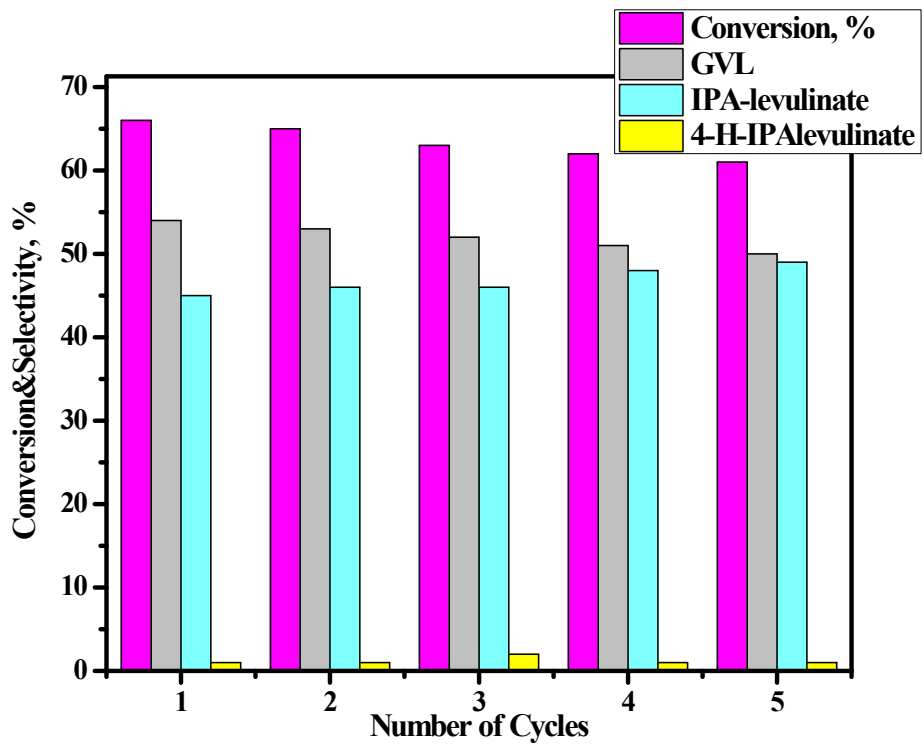

Figure S7. Reusability studies for CTH of LA to GVL.

Reaction conditions: LA (5 mL); IPA (95 mL); Ni loading, 50%; temperature, 200°C; N<sub>2</sub> atm; catalyst, 0.5 g; reaction time, 0.5 h.



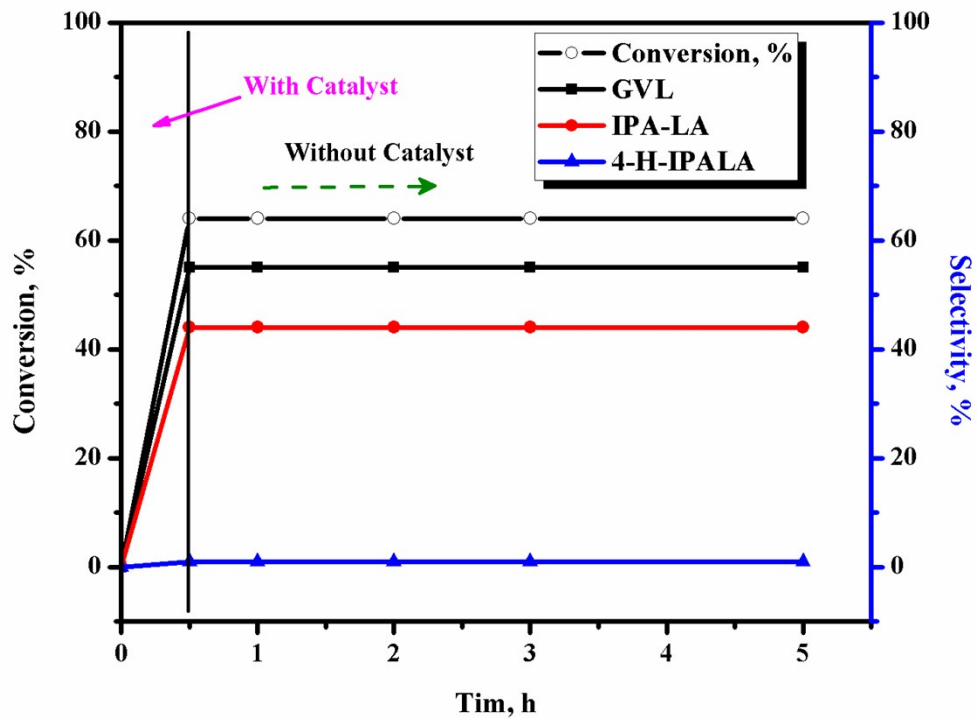

Figure S8. Metal leaching test by hot filtration

Reaction conditions: LA (5 mL); IPA (95 mL); Metal loading, 50%; temperature, 200 °C;

N<sub>2</sub> atm; catalyst, 0.5 g; reaction time, 5 h.

Table S1. XPS composition study of Ni-MMT catalyst

| <b>Sample</b>    | <b>Species</b>        |              |                            |
|------------------|-----------------------|--------------|----------------------------|
| Fresh 50%-Ni-MMT | <b>Ni<sup>0</sup></b> | <b>NiO</b>   | <b>Ni (OH)<sub>2</sub></b> |
| <b>BE</b>        | 852.4                 | 855.2        | 856.6                      |
| <b>%</b>         | <b>9.31</b>           | <b>64.37</b> | <b>26.31</b>               |
| Bare Ni NP's     | <b>Ni<sup>0</sup></b> | <b>NiO</b>   | <b>Ni (OH)<sub>2</sub></b> |
| <b>BE</b>        | 852.1                 | 854.2        | 855.4                      |
| <b>%</b>         | <b>18.5</b>           | <b>54.17</b> | <b>27.29</b>               |
| Used 50%-Ni-MMT  | <b>Ni<sup>0</sup></b> | <b>NiO</b>   | <b>Ni (OH)<sub>2</sub></b> |
| <b>BE</b>        | 852.9                 | 855.4        | 856.8                      |
| <b>%</b>         | <b>35.99</b>          | <b>40.05</b> | <b>23.94</b>               |

Table S2. Solvent screening for CTH of LA to GVL over 50%-Ni/MMT catalyst

| <b>Solvent</b> | <b>% Conversion</b> | <b>Levulinic esters</b> | <b>GVL</b> | <b>Others</b> |
|----------------|---------------------|-------------------------|------------|---------------|
| Methanol       | 99                  | 99                      | 1          | <0.01         |
| Ethanol        | 99                  | 98                      | 2          | <0.01         |
| n-Propanol     | 99                  | 95                      | 4          | 1             |
| n-Butanol      | 99                  | 90                      | 7          | 3             |
| Isoproanol     | 99                  | <0.01                   | 99         | 1             |
| Isobutanol     | 99                  | <0.01                   | 99         | 1             |

Reaction conditions: LA (5 mL); solvent, (MeOH, EtOH, n-PrOH, n-BuOH, IPA and isobutanol) (95 mL); Metal loading, 50%; temperature, 200 °C; N<sub>2</sub> atm; catalyst, 0.5 g; reaction time, 1 h.

Table S3. H<sub>2</sub>-TPR results and metal dispersion of screened catalysts for CTH of LA.

| Catalyst                              | Total H <sub>2</sub> consumed (mmol/g) | Temperature regions H <sub>2</sub> consumed (mmol/g) |            |            | Metal dispersion (%) |
|---------------------------------------|----------------------------------------|------------------------------------------------------|------------|------------|----------------------|
|                                       |                                        | 50-200 °C                                            | 200-400 °C | 400-700 °C |                      |
| 50%-Ni-MMT                            | 6.9                                    | --                                                   | --         | 6.9        | 23                   |
| 50%-Ni/Al <sub>2</sub> O <sub>3</sub> | 10.7                                   | --                                                   | --         | 10.7       | 17                   |
| 50%-Ni-ZnO                            | 8.9                                    | --                                                   | --         | 8.9        | 19                   |
| 50%-Ni/SiO <sub>2</sub>               | 7.8                                    |                                                      |            | 7.8        | 9                    |

Table S4. NH<sub>3</sub>-TPD results of screened catalysts for CTH of LA.

| Catalyst                              | Total NH <sub>3</sub> desorbed<br>(μmol/g) | Temperature regions NH <sub>3</sub> desorption<br>(μmol/g) |            |            |
|---------------------------------------|--------------------------------------------|------------------------------------------------------------|------------|------------|
|                                       |                                            | 50-200 °C                                                  | 200-400 °C | 400-700 °C |
| Ni-MMT                                | 0.458                                      | 0.019                                                      | 0.0152     | 0.424      |
| 50%-Ni/Al <sub>2</sub> O <sub>3</sub> | 0.248                                      | 0.0341                                                     | 0.214      | -          |
| 50%-Ni-ZnO                            | 0.135                                      | 0.014                                                      | 0.12       | -          |

Table S5. Activity of fresh and used 50%-Ni/MMT for LA to GVL conversion

| Entry | Catalyst | Conversion<br>(%) | Selectivity (%) |                    |                        |
|-------|----------|-------------------|-----------------|--------------------|------------------------|
|       |          |                   | GVL             | IPA-<br>levulinate | 4-H-IPA-<br>levulinate |
| 1     | Fresh    | 99                | 99              | 0.01               | 1                      |
| 2     | Used*    | 99                | 99              | 0.01               | 1                      |

\*After 1<sup>st</sup> run

Reaction conditions: LA (5 mL); IPA (95 mL); Ni loading, 50%; temperature, 200°C; N<sub>2</sub> atm; catalyst, 0.5 g; reaction time, 1 h.
